# Supplementary material for: Transcriptional activation of Jun and Fos members of the AP‐1 complex is a conserved signature of immune aging that contributes to inflammaging
Source: PubMed Central journal article supplement (PMC10086525; doi:10.1111/acel.13792), 2023-02-24

**A** Chromatin accessibility changes with age

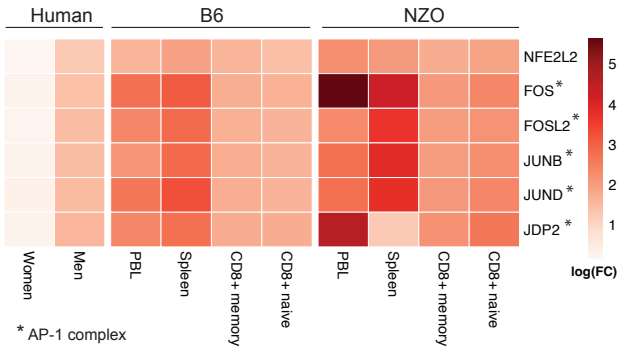

**B** Motif results for opening peaks in human and mice

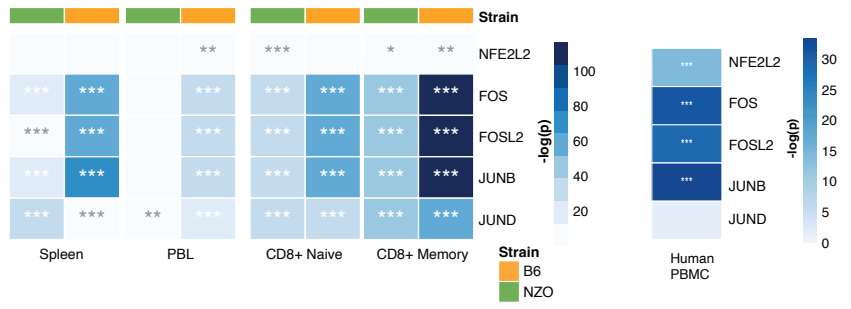

**C** HINT analysis (B6 CD8+ memory T)    **D** HINT analysis (NZO CD8+ memory T)

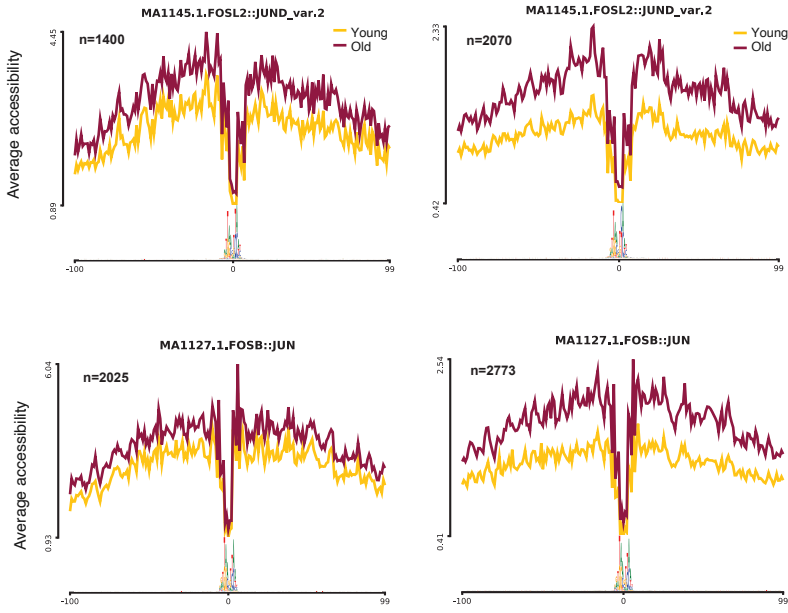

**E** Enrichment of NF- $\kappa$ B pathway across cell types

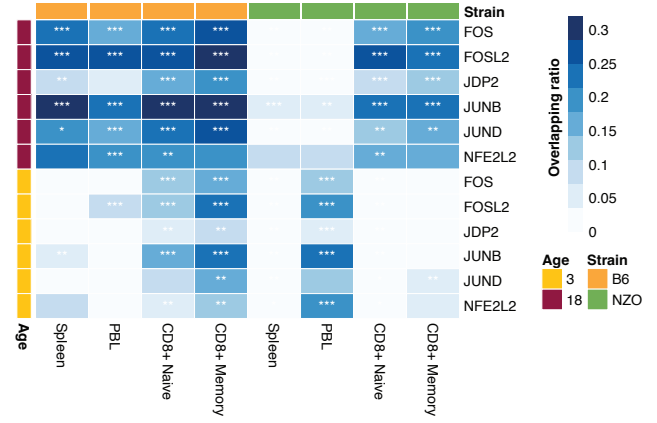

Supplement: ACEL-22-e13792-s002.pdf [file ACEL-22-e13792-s002.pdf]
