# Supplementary material for: Transcriptional activation of Jun and Fos members of the AP‐1 complex is a conserved signature of immune aging that contributes to inflammaging
Source: PubMed Central journal article supplement (PMC10086525; doi:10.1111/acel.13792), 2023-02-24

Memory

Naive

PBL

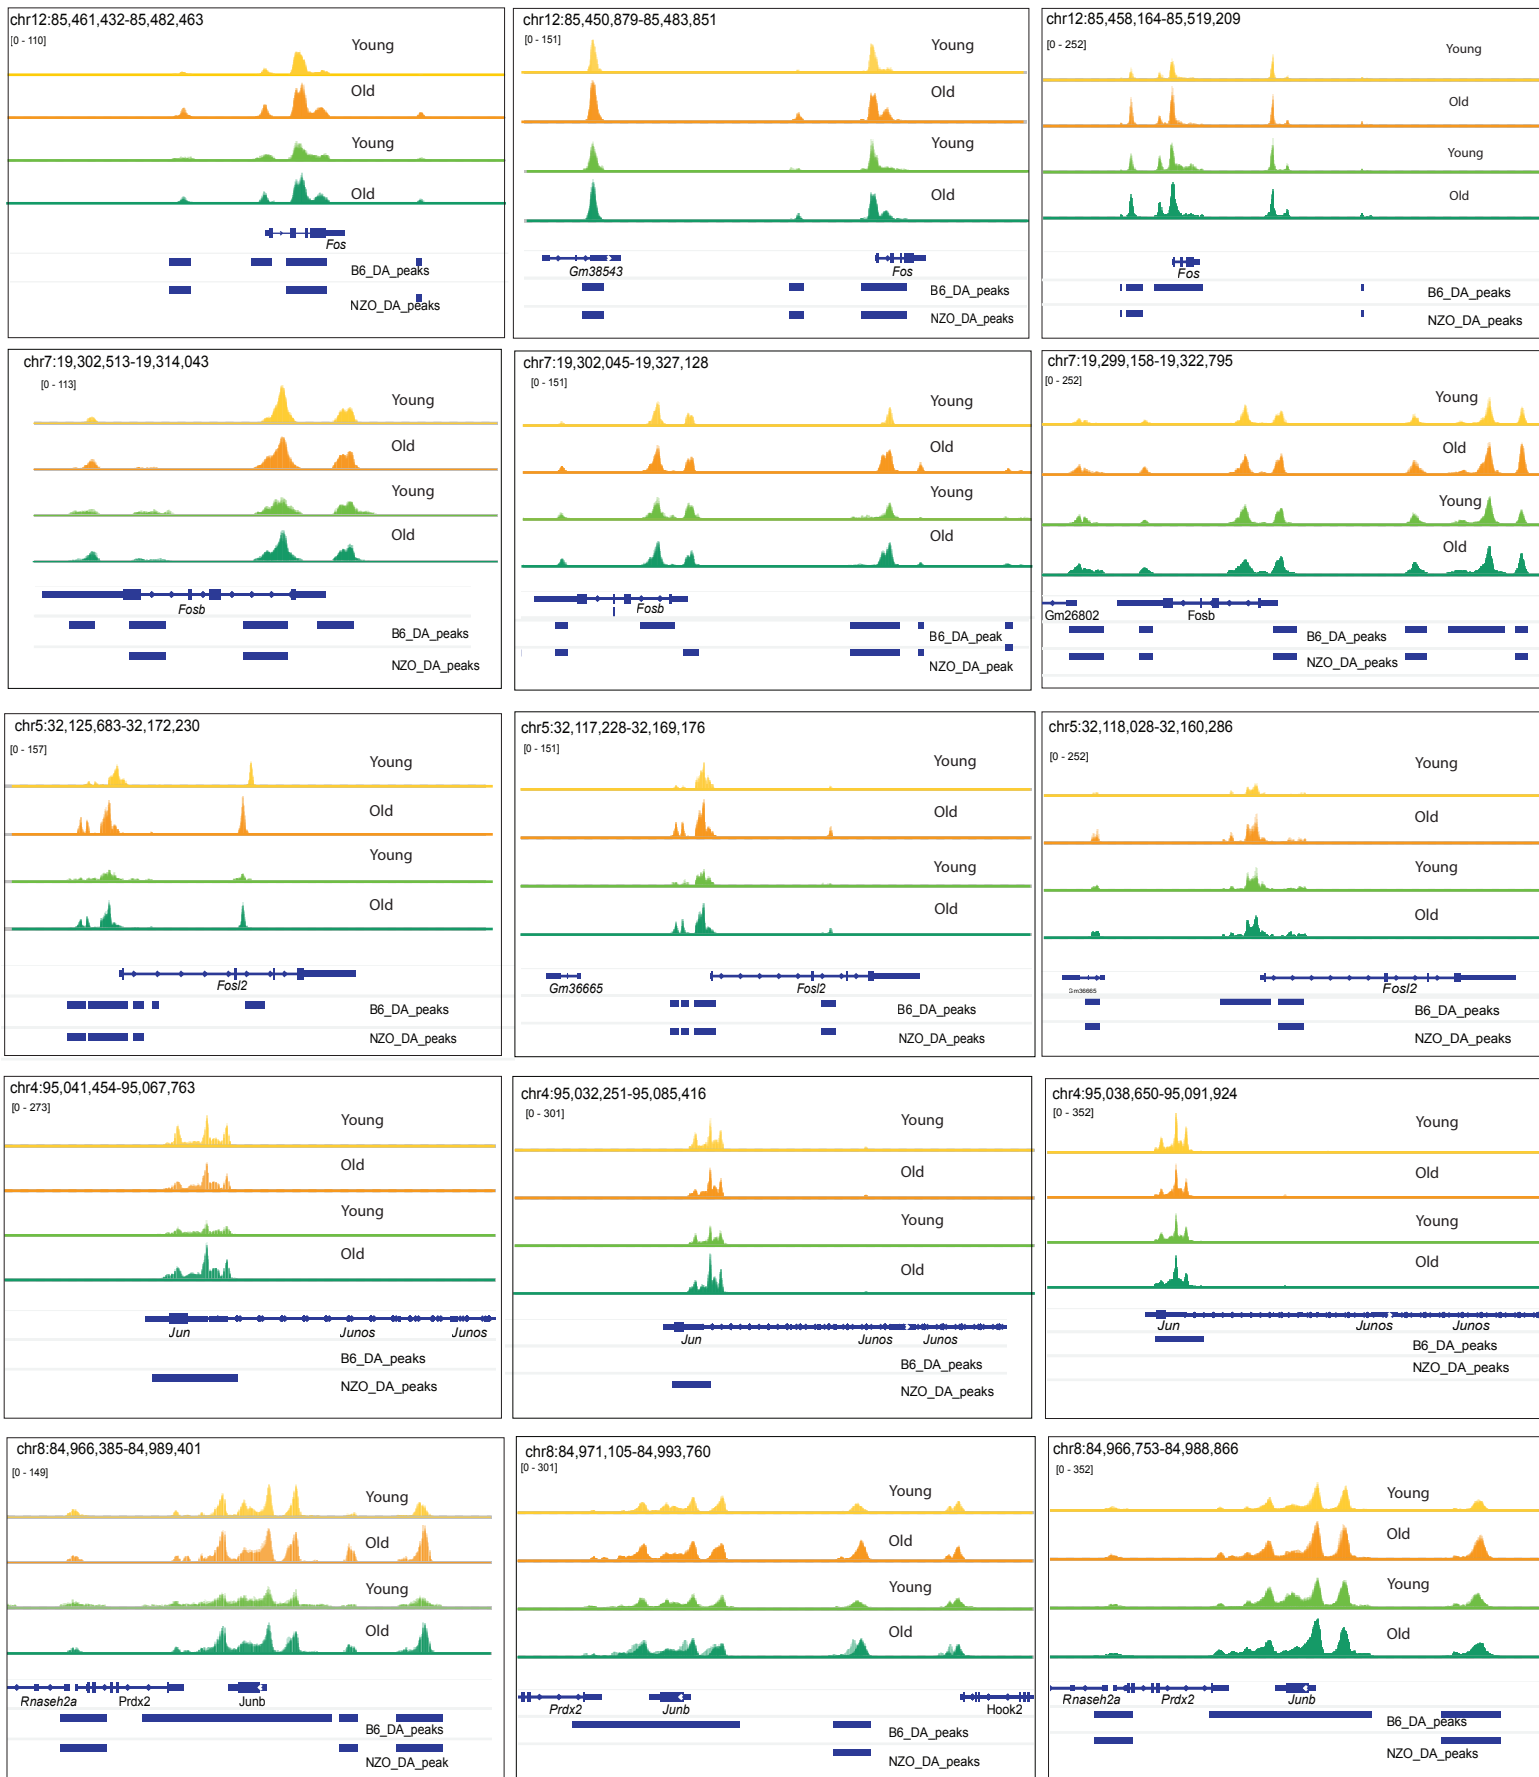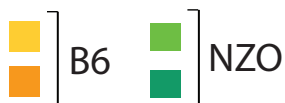

Supplement: ACEL-22-e13792-s006.pdf [file ACEL-22-e13792-s006.pdf]
