# Supplementary material for: Transcriptional activation of Jun and Fos members of the AP‐1 complex is a conserved signature of immune aging that contributes to inflammaging
Source: PubMed Central journal article supplement (PMC10086525; doi:10.1111/acel.13792), 2023-02-24

**A** Summary of the overlaps (peak and gene directions)

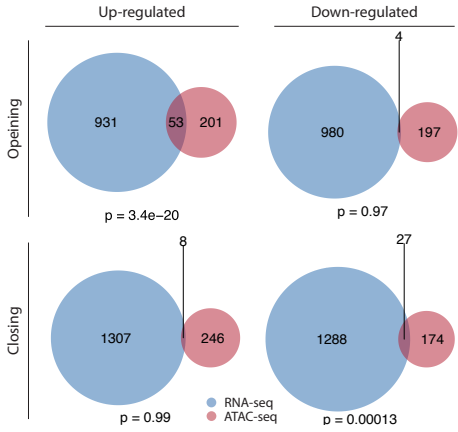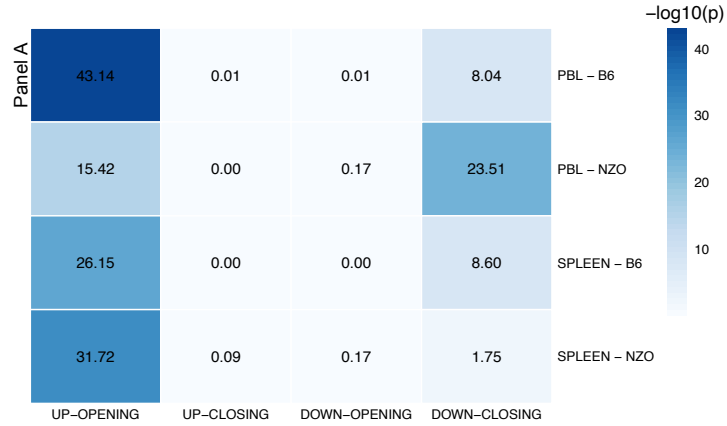

**B** Functional enrichments of age-related changes

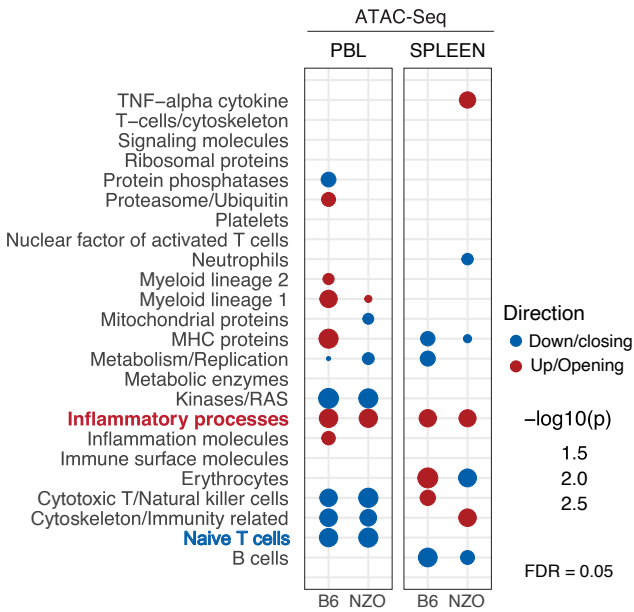

**C** Genome browsers of mice spleen

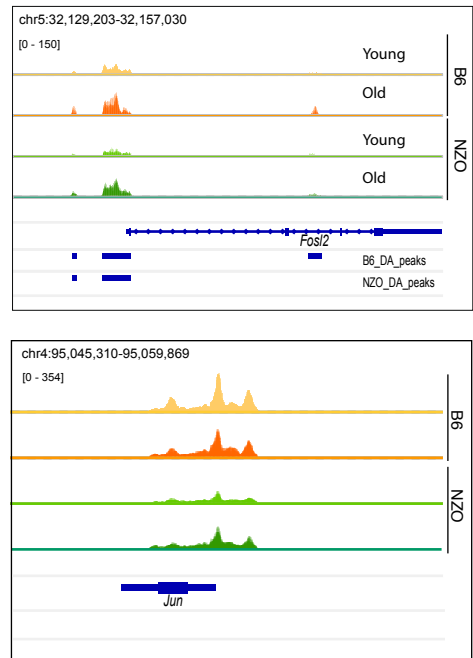

Supplement: ACEL-22-e13792-s008.pdf [file ACEL-22-e13792-s008.pdf]
