# Supplementary material for: Transcriptional activation of Jun and Fos members of the AP‐1 complex is a conserved signature of immune aging that contributes to inflammaging
Source: PubMed Central journal article supplement (PMC10086525; doi:10.1111/acel.13792), 2023-02-24

**A** Number of samples per age

| Flow Cytometry | B6     |    |    | NZO |        |   |    |    |
|----------------|--------|----|----|-----|--------|---|----|----|
|                | months | 3  | 12 | 18  | months | 3 | 12 | 18 |
| PBL            | 5      | 0  | 6  | 6   | 0      | 6 |    |    |
| spleen         | 11     | 11 | 6  | 6   | 11     | 6 |    |    |

  

| ATACseq     | B6     |   |    | NZO |        |   |    |    |
|-------------|--------|---|----|-----|--------|---|----|----|
|             | months | 3 | 12 | 18  | months | 3 | 12 | 18 |
| PBL         | 5      | 0 | 5  | 6   | 0      | 5 |    |    |
| spleen      | 4      | 1 | 5  | 5   | 6      | 6 |    |    |
| CD8+ memory | 5      | 0 | 5  | 6   | 0      | 6 |    |    |
| CD8+ naive  | 3      | 0 | 5  | 6   | 0      | 6 |    |    |

  

| RNAseq      | B6     |   |    | NZO |        |   |    |    |
|-------------|--------|---|----|-----|--------|---|----|----|
|             | months | 3 | 12 | 18  | months | 3 | 12 | 18 |
| PBL         | 5      | 0 | 6  | 6   | 0      | 6 |    |    |
| spleen      | 5      | 6 | 6  | 6   | 6      | 6 |    |    |
| CD8+ memory | 5      | 0 | 6  | 6   | 0      | 6 |    |    |
| CD8+ naive  | 5      | 0 | 5  | 6   | 0      | 6 |    |    |

**E** Percentage of variances explained by meta data with interactions (PVCA)

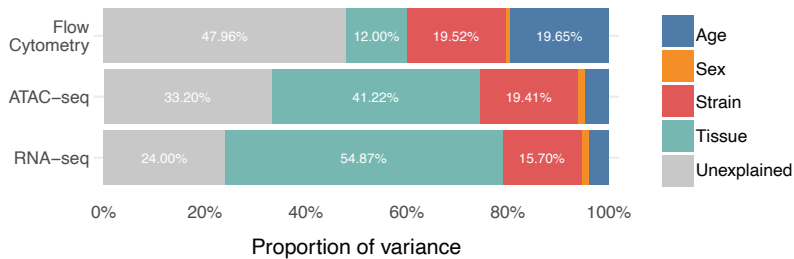

**B** PCA plots for flow cytometry

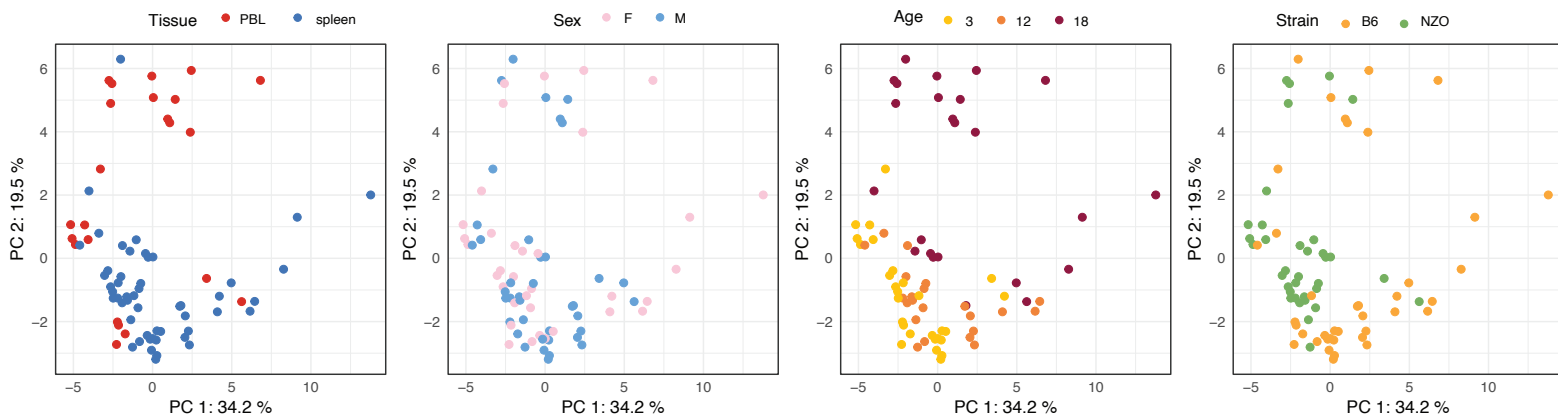

**C** PCA plots for ATAC-seq data

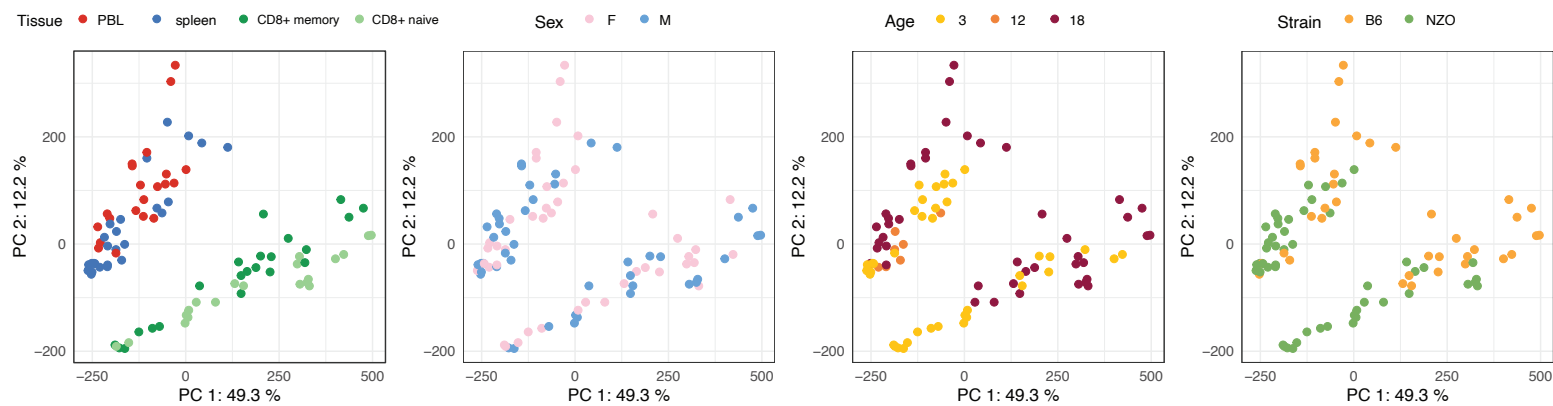

**D** PCA plots for RNA-seq data

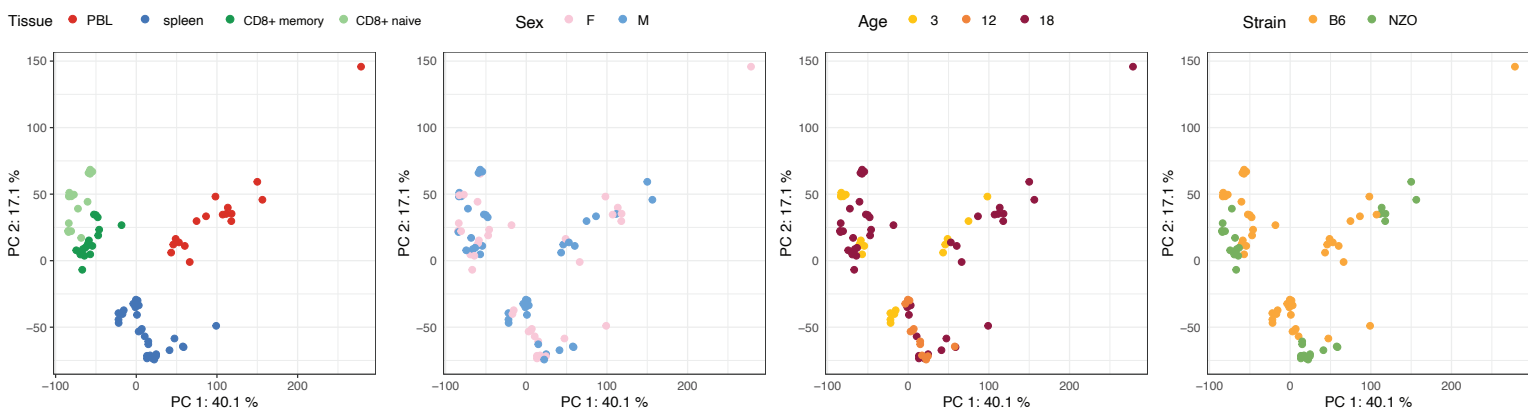

Supplement: ACEL-22-e13792-s011.pdf [file ACEL-22-e13792-s011.pdf]
