# Supplementary material for: Transcriptional activation of Jun and Fos members of the AP‐1 complex is a conserved signature of immune aging that contributes to inflammaging
Source: PubMed Central journal article supplement (PMC10086525; doi:10.1111/acel.13792), 2023-02-24
Supplement: ACEL-22-e13792-s013.pdf [file ACEL-22-e13792-s013.pdf]

# A Flow cytometry strategy for all cell types

Figure S2

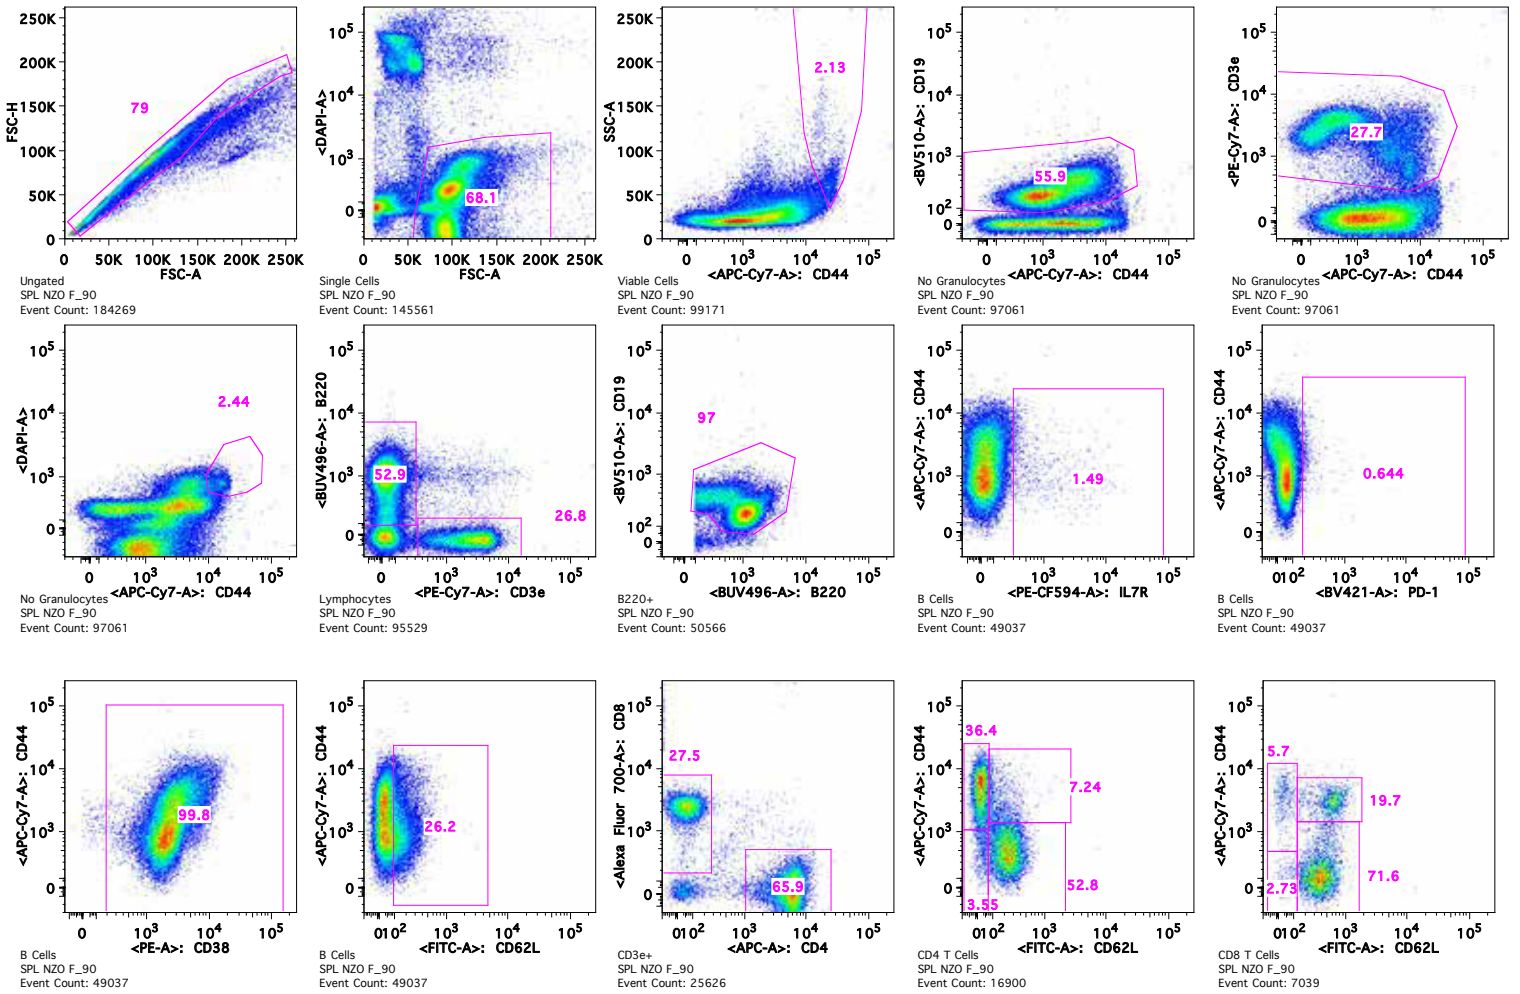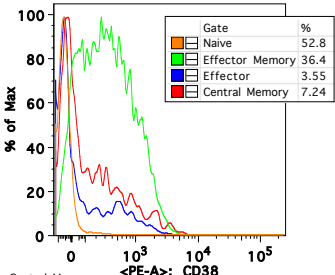

Central Memory  
SPL NZO F\_90  
Event Count: 1...

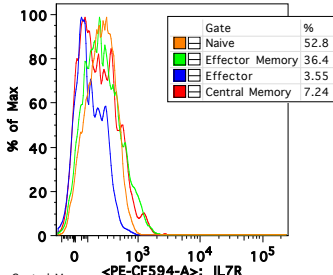

Central Memory  
SPL NZO F\_90  
Event Count: 1...

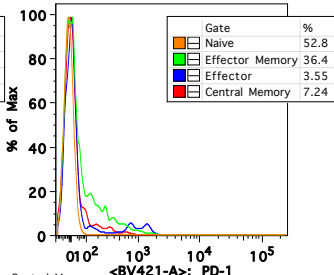

Central Memory  
SPL NZO F\_90  
Event Count: 1...

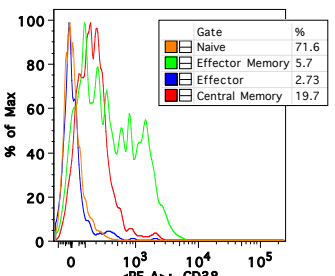

Central Memory  
SPL NZO F\_90  
Event Count: 1...

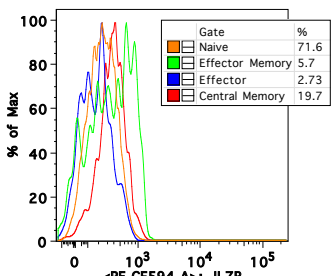

Central Memory  
SPL NZO F\_90  
Event Count: 1...

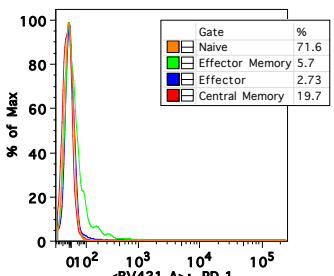

Central Memory  
SPL NZO F\_90  
Event Count: 1...

| GateName        | Count | Freq. of Parent | Freq. of Viable Cells | Freq. of Lymphocytes |
|-----------------|-------|-----------------|-----------------------|----------------------|
| CD4 T Cells     | 16900 | 65.9            | 17                    | 17.7                 |
| Central Memory  | 1224  | 7.24            | 1.23                  | 1.28                 |
| Effector        | 600   | 3.55            | 0.605                 | 0.628                |
| Effector Memory | 6159  | 36.4            | 6.21                  | 6.45                 |
| Naive           | 8920  | 52.8            | 8.99                  | 9.34                 |
| CD8 T Cells     | 7039  | 27.5            | 7.1                   | 7.37                 |
| Central Memory  | 1385  | 19.7            | 1.4                   | 1.45                 |
| Effector        | 192   | 2.73            | 0.194                 | 0.201                |
| Effector Memory | 401   | 5.7             | 0.404                 | 0.42                 |
| Naive           | 5039  | 71.6            | 5.08                  | 5.27                 |
| B Cells         | 49037 | 97              | 49.4                  | 51.3                 |
| Monocytes       | 1532  | 1.58            | 1.54                  |                      |
| Granulocytes    | 2110  | 2.13            | 2.13                  |                      |
