# Supplementary material for: Transcriptional activation of Jun and Fos members of the AP‐1 complex is a conserved signature of immune aging that contributes to inflammaging
Source: PubMed Central journal article supplement (PMC10086525; doi:10.1111/acel.13792), 2023-02-24

## A All cell-compositional changes in mice

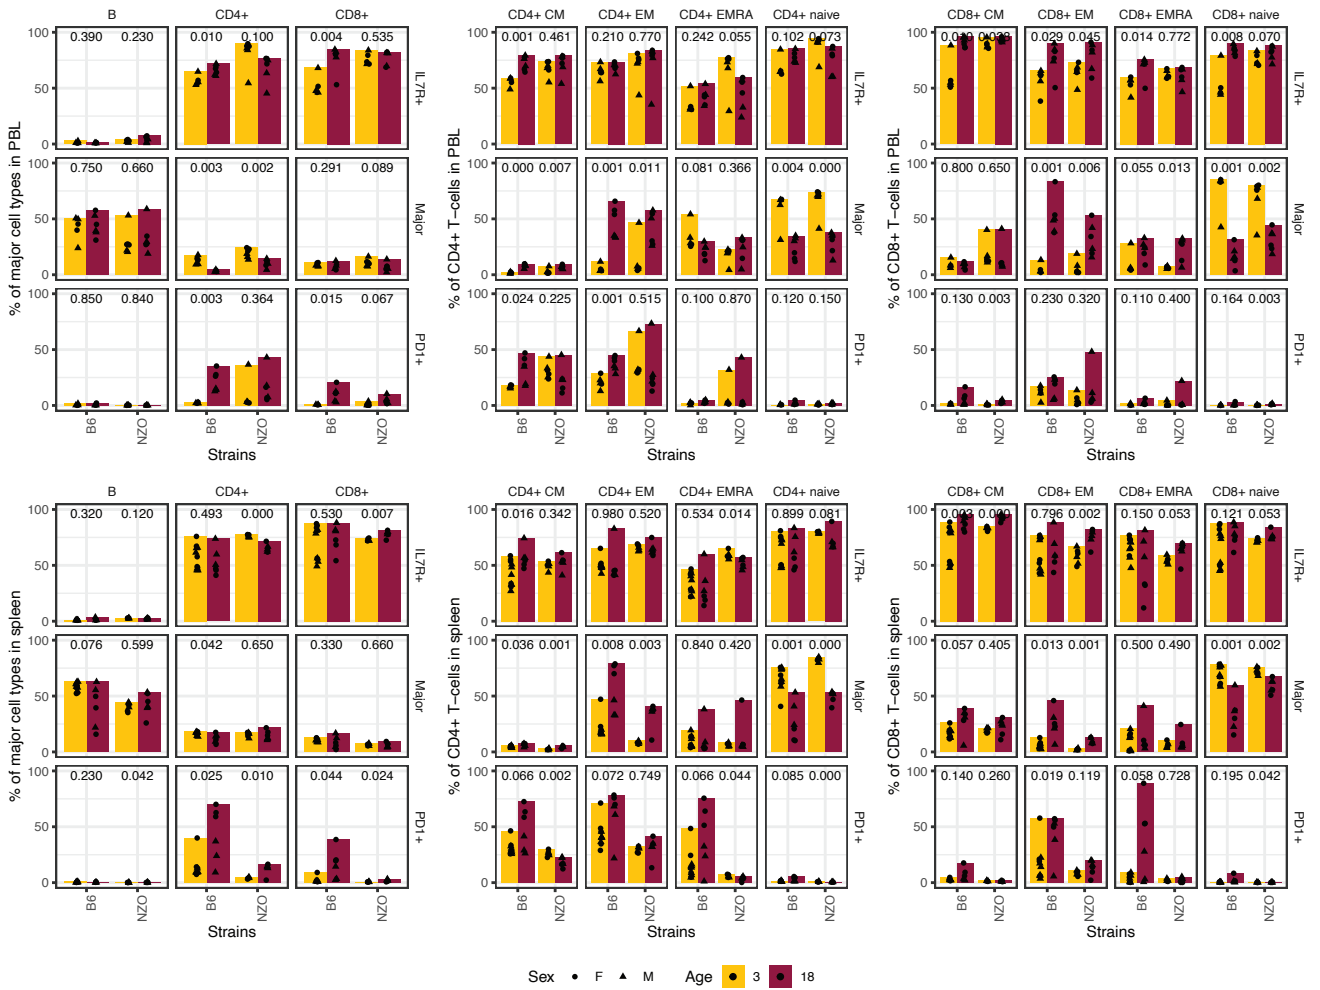

## B Age and cell composition associations for IL7R/PD1 populations (mice)

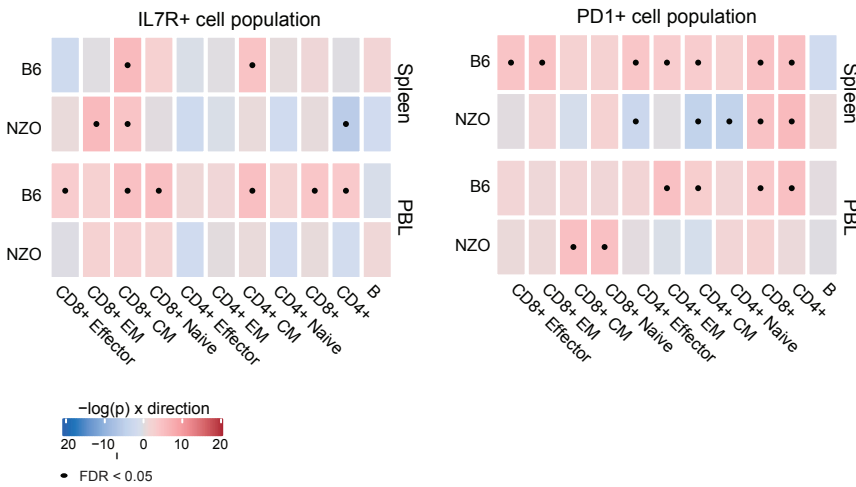

Supplement: ACEL-22-e13792-s023.pdf [file ACEL-22-e13792-s023.pdf]
